# Supplementary material for: HIV-specific Fc effector function early in infection predicts the development of broadly neutralizing antibodies
Source: PubMed Central journal article supplement (PMC5908199; doi:10.1371/journal.ppat.1006987), 2018-04-09

**gp120 CAP45      gp140 C.ZA.11MB      gp120 ConC**

**ADCP**  
Phagocytosis

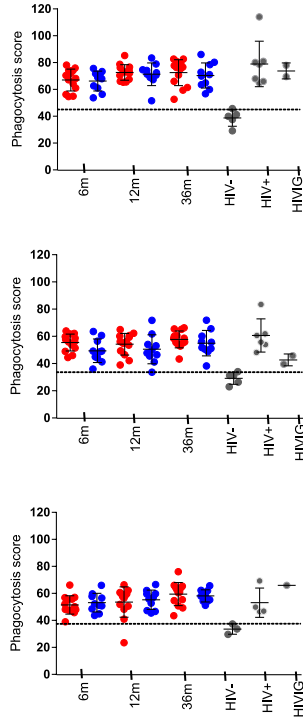

**ADCD**  
Complement

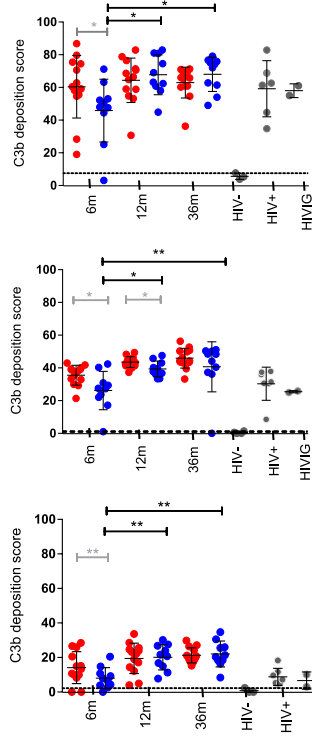

**ADCT**  
Trogoctysis

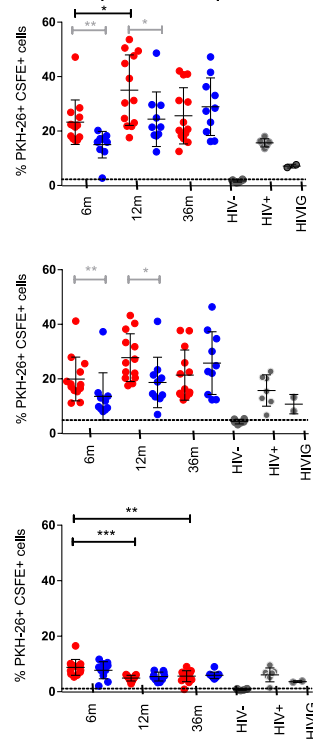

**ADCC**  
Cytotoxicity

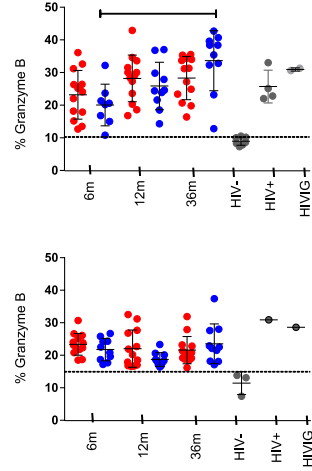

Supplement: ppat.1006987.s002.pdf [file ppat.1006987.s002.pdf]
