# Supplementary material for: HIV-specific Fc effector function early in infection predicts the development of broadly neutralizing antibodies
Source: PubMed Central journal article supplement (PMC5908199; doi:10.1371/journal.ppat.1006987), 2018-04-09

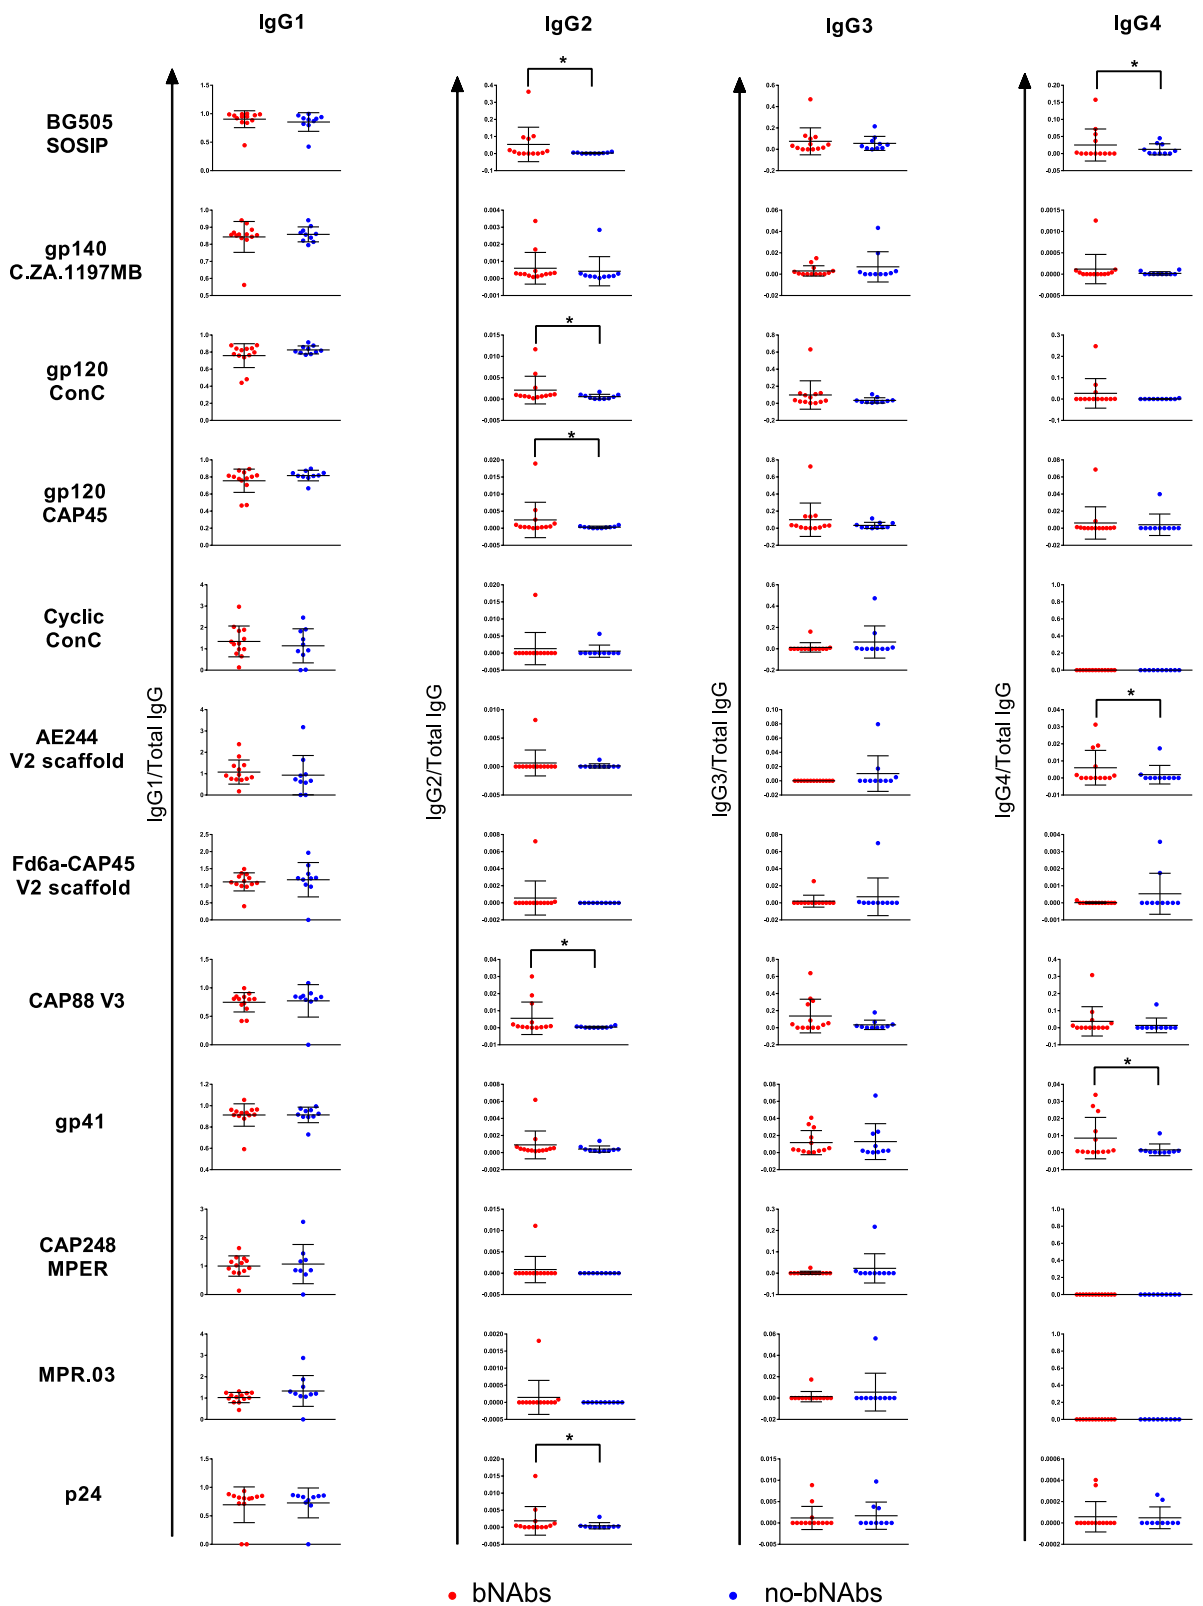

Supplement: ppat.1006987.s006.pdf [file ppat.1006987.s006.pdf]
