# Supplementary material for: HIV-specific Fc effector function early in infection predicts the development of broadly neutralizing antibodies
Source: PubMed Central journal article supplement (PMC5908199; doi:10.1371/journal.ppat.1006987), 2018-04-09
Supplement: ppat.1006987.s008.pdf [file ppat.1006987.s008.pdf]

**S1 Table. Participants with and without bNAbs included in this study**  
**Table A. Participants with bNAbs**

| <b>Participants</b> | <b>Viral load</b> | <b>CD4<br/>(cells/uL)</b> | <b>% Neutralization<br/>breadth (3 years)</b> |
|---------------------|-------------------|---------------------------|-----------------------------------------------|
| CAP257              | 14800             | 528.0                     | 82.0                                          |
| CAP256              | 750000            | 500.0                     | 77.0                                          |
| CAP312              | 10400             | 692.0                     | 64.0                                          |
| CAP287              | 36300             | 277.0                     | 61.0                                          |
| CAP248              | 1290              | 355.0                     | 59.0                                          |
| CAP292              | 134000            | 492.0                     | 55.0                                          |
| CAP177              | 32300             | 426.0                     | 52.0                                          |
| CAP341              | 521               | 322.0                     | 50.0                                          |
| CAP206              | 156000            | 267.0                     | 47.0                                          |
| CAP255              | 49200             | 415.0                     | 47.0                                          |
| CAP357              | 8490              | 418.0                     | 45.0                                          |
| CAP8                | 98400             | 343.0                     | 42.0                                          |
| CAP288              | 53300             | 295.0                     | 41.0                                          |
| <b>Median</b>       | <b>36300.0</b>    | <b>415.0</b>              | <b>52.0</b>                                   |

**Table B. Participants without bNAbs**

| <b>Participants</b> | <b>Viral load</b> | <b>CD4<br/>(cells/uL)</b> | <b>% Neutralization<br/>breadth (3 years)</b> |
|---------------------|-------------------|---------------------------|-----------------------------------------------|
| CAP188              | 66900             | 427.0                     | 11.0                                          |
| CAP228              | 817               | 816.0                     | 7.0                                           |
| CAP229              | 8470              | 607.0                     | 7.0                                           |
| CAP265              | 400               | 954.0                     | 7.0                                           |
| CAP268              | 14800             | 668.0                     | 7.0                                           |
| CAP225              | 59700             | 496.0                     | 5.0                                           |
| CAP237              | 9960              | 492.0                     | 5.0                                           |
| CAP271              | 14400             | 463.0                     | 5.0                                           |
| CAP200              | 349000            | 440.0                     | 2.0                                           |
| CAP88               | 21100             | 864.0                     | 0.0                                           |
| <b>Median</b>       | <b>14600.0</b>    | <b>551.5</b>              | <b>6.0</b>                                    |

Viral load and CD4 count at 6 months post-infection and % neutralization breadth against a 44 virus panel at 3 years post-infection.
