# Supplementary material for: HIV-specific Fc effector function early in infection predicts the development of broadly neutralizing antibodies
Source: PubMed Central journal article supplement (PMC5908199; doi:10.1371/journal.ppat.1006987), 2018-04-09
Supplement: ppat.1006987.s009.pdf [file ppat.1006987.s009.pdf]

**Table S2. List of variables significantly associated with bNAb individuals adjusted for multiple comparisons**

| <b>Variable</b>                      | <b>P value</b> | <b>BH critical value</b> | <b>Adjusted P value</b> | <b>Spearman's coefficient</b> |
|--------------------------------------|----------------|--------------------------|-------------------------|-------------------------------|
| <b>gp120 ConC FcγRIIIa-V158</b>      | 0.0003         | 0.0017                   | <i>0.0087</i>           | 0.69                          |
| <b>gp120 ConC FcγRIIb</b>            | 0.0004         | 0.0034                   | <i>0.0058</i>           | 0.67                          |
| <b>gp120 CAP45 FcγRIIIa-V158</b>     | 0.0006         | 0.0052                   | <i>0.0058</i>           | 0.66                          |
| <b>IgG total gp120 ConC</b>          | 0.0015         | 0.0069                   | <i>0.0109</i>           | 0.62                          |
| <b>gp140 Fc polyfunction</b>         | 0.0027         | 0.0086                   | <i>0.0157</i>           | 0.60                          |
| <b>CD4 count</b>                     | 0.0031         | 0.0103                   | <i>0.0150</i>           | -0.59                         |
| <b>gp120 ConC Fc polyfunction</b>    | 0.0036         | 0.0121                   | <i>0.0149</i>           | 0.58                          |
| <b>gp120 CAP45 FcγRIIIb NA2</b>      | 0.0058         | 0.0138                   | <i>0.0210</i>           | 0.56                          |
| <b>gp120 ConC C1q</b>                | 0.0059         | 0.0155                   | <i>0.0190</i>           | 0.56                          |
| <b>CXCL13</b>                        | 0.0075         | 0.0172                   | <i>0.0218</i>           | 0.54                          |
| <b>gp120 ConC FcγRIIIb NA2</b>       | 0.0075         | 0.0190                   | <i>0.0198</i>           | 0.54                          |
| <b>gp120 ConC FcγRIIb</b>            | 0.0083         | 0.0207                   | <i>0.0201</i>           | 0.54                          |
| <b>gp120 CAP45 FcγRIIIa-F158</b>     | 0.0094         | 0.0224                   | <i>0.0210</i>           | 0.53                          |
| <b>gp120 ConC FcγRIIIa-F158</b>      | 0.0118         | 0.0241                   | <i>0.0244</i>           | 0.52                          |
| <b>gp120 CAP45 FcγRIIa-H131</b>      | 0.0153         | 0.0259                   | <i>0.0296</i>           | 0.50                          |
| <b>gp120 ConC subclass diversity</b> | 0.0178         | 0.0276                   | <i>0.0323</i>           | 0.49                          |
| <b>IgG total gp120 CAP45</b>         | 0.0262         | 0.0293                   | <i>0.0447</i>           | 0.46                          |
| gp120 ConC FcγRIIa-R131              | 0.0312         | 0.0310                   | 0.0503                  | 0.45                          |
| CAP45 C1q                            | 0.0366         | 0.0328                   | 0.0559                  | 0.44                          |
| IgG total gp140                      | 0.0443         | 0.0345                   | 0.0642                  | 0.42                          |
| gp120 CAP45 FcγRIIa-R131             | 0.0642         | 0.0362                   | 0.0887                  | 0.39                          |
| Total IgG1                           | 0.0752         | 0.0379                   | 0.0991                  | 0.38                          |
| gp140 subclass diversity             | 0.0817         | 0.0397                   | 0.1030                  | 0.37                          |
| gp120 ConC FcγRIIa-H131              | 0.0941         | 0.0414                   | 0.1137                  | 0.36                          |
| gp120 CAP45 subclass diversity       | 0.1081         | 0.0431                   | 0.1254                  | 0.34                          |
| Total IgG                            | 0.1583         | 0.0448                   | 0.1766                  | 0.30                          |
| Total IgG3                           | 0.1781         | 0.0466                   | 0.1913                  | -0.29                         |
| gp120 CAP45 Fc polyfunction          | 0.2227         | 0.0483                   | 0.2307                  | 0.26                          |
| Log viral load                       | 0.3641         | 0.0500                   | 0.3641                  | 0.20                          |

Significant variables after adjustment by the Benjamini–Hochberg (BH) procedure are shown in bold with their corresponding adjusted p-value shown in italics.
